# Supplementary material for: Detection of Germline Mutations in Patients with Epithelial Ovarian Cancer Using Multi-gene Panels: Beyond BRCA1/2
Source: PubMed Central journal article supplement — Cancer Res Treat. 2017 Sep 27;50(3):917–25. doi: 10.4143/crt.2017.220 (PMC6056949; doi:10.4143/crt.2017.220), 2017-09-27
Supplement: crt-2017-220-suppl1.pdf [file crt-2017-220-suppl1.pdf]

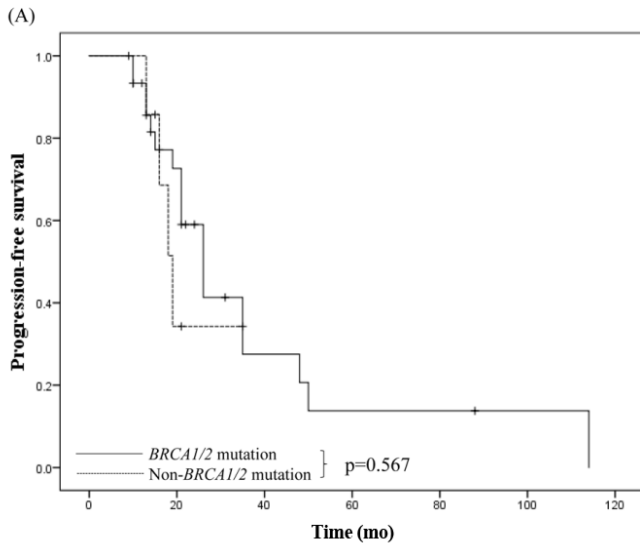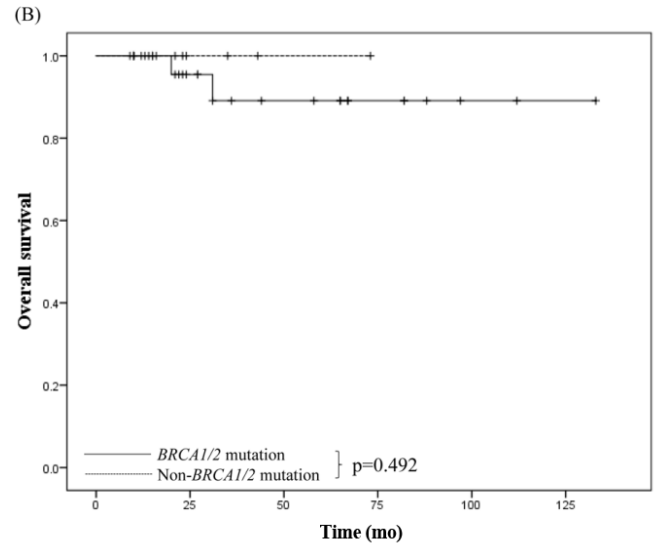

**S1 Fig.** Comparison of progression-free survival and overall survival between patients with *BRCA1/2* mutation and patients with non-*BRCA1/2* mutation.
